# Supplementary material
Source: MDPI journal article supplement (https://www.mdpi.com/2073-4441/13/2/204)
Supplement: s1 [file s1]

## Sheet: AChE
Table S1. Results of Tukey test (after one-way ANOVA) on AChE data. Significant differences between pairs are indicated by 1.
Comapaired pairs	Significance (p < 0.05)	Significance (p < 0.01)	Significance (p < 0.001)
DMSO 48 hpf Control 48 hpf	0	0	0
0.07 mg/L 48 hpf Control 48 hpf	0	0	0
0.07 mg/L 48 hpf DMSO 48 hpf	0	0	0
0.4 mg/L 48 hpf Control 48 hpf	0	0	0
0.4 mg/L 48 hpf DMSO 48 hpf	0	0	0
0.4 mg/L 48 hpf 0.07 mg/L 48 hpf	0	0	0
0.75 mg/L 48 hpf Control 48 hpf	1	0	0
0.75 mg/L 48 hpf DMSO 48 hpf	1	0	0
0.75 mg/L 48 hpf 0.07 mg/L 48 hpf	1	0	0
0.75 mg/L 48 hpf 0.4 mg/L 48 hpf	0	0	0
1.5 mg/L 48 hpf Control 48 hpf	1	1	1
1.5 mg/L 48 hpf DMSO 48 hpf	1	1	1
1.5 mg/L 48 hpf 0.07 mg/L 48 hpf	1	1	1
1.5 mg/L 48 hpf 0.4 mg/L 48 hpf	0	0	0
1.5 mg/L 48 hpf 0.75 mg/L 48 hpf	0	0	0
3 mg/L 48 hpf Control 48 hpf	1	0	0
3 mg/L 48 hpf DMSO 48 hpf	1	0	0
3 mg/L 48 hpf 0,07 mg/L 48 hpf	1	1	0
3 mg/L 48 hpf 0,4 mg/L 48 hpf	1	1	1
3 mg/L 48 hpf 0.75 mg/L 48 hpf	0	0	0
3 mg/L 48 hpf 1.5 mg/L 48 hpf	0	0	0
Control 72 hpf Control 48 hpf	0	0	0
Control 72 hpf DMSO 48 hpf	0	0	0
Control 72 hpf 0.07 mg/L 48 hpf	0	0	0
Control 72 hpf 0.4 mg/L 48 hpf	0	0	0
Control 72 hpf 0.75 mg/L 48 hpf	1	0	0
Control 72 hpf 1.5 mg/L 48 hpf	1	0	0
Control 72 hpf 3 mg/L 48 hpf	1	0	0
DMSO 72 hpf Control 48 hpf	0	0	0
DMSO 72 hpf DMSO 48 hpf	0	0	0
DMSO 72 hpf 0.07 mg/L 48 hpf	0	0	0
DMSO 72 hpf 0.4 mg/L 48 hpf	0	0	0
DMSO 72 hpf 0.75 mg/L 48 hpf	0	0	0
DMSO 72 hpf 1.5 mg/L 48 hpf	1	0	0
DMSO 72 hpf 3 mg/L 48 hpf	1	0	0
DMSO 72 hpf Control 72 hpf	0	0	0
0.07 mg/L 72 hpf Control 48 hpf	0	0	0
0.07 mg/L 72 hpf DMSO 48 hpf	0	0	0
0.07 mg/L 72 hpf 0.07 mg/L 48 hpf	0	0	0
0.07 mg/L 72 hpf 0.4 mg/L 48 hpf	1	0	0
0.07 mg/L 72 hpf 0.75 mg/L 48 hpf	1	0	0
0.07 mg/L 72 hpf 1.5 mg/L 48 hpf	1	0	0
0.07 mg/L 72 hpf 3 mg/L 48 hpf	1	1	1
0.07 mg/L 72 hpf Control 72 hpf	0	0	0
0.07 mg/L 72 hpf DMSO 72 hpf	0	0	0
0.4 mg/L 72 hpf Control 48 hpf	0	0	0
0.4 mg/L 72 hpf DMSO 48 hpf	0	0	0
0.4 mg/L 72 hpf 0.07 mg/L 48 hpf	0	0	0
0.4 mg/L 72 hpf 0.4 mg/L 48 hpf	0	0	0
0.4 mg/L 72 hpf 0.75 mg/L 48 hpf	0	0	0
0.4 mg/L 72 hpf 1.5 mg/L 48 hpf	1	0	0
0.4 mg/L 72 hpf 3 mg/L 48 hpf	1	0	0
0.4 mg/L 72 hpf Control 72 hpf	0	0	0
0.4 mg/L 72 hpf DMSO 72 hpf	0	0	0
0.4 mg/L 72 hpf 0.07 mg/L 72 hpf	0	0	0
0.75 mg/L 72 hpf Control 48 hpf	1	0	0
0.75 mg/L 72 hpf DMSO 48 hpf	0	0	0
0.75 mg/L 72 hpf 0.07 mg/L 48 hpf	0	0	0
0.75 mg/L 72 hpf 0.4 mg/L 48 hpf	0	0	0
0.75 mg/L 72 hpf 0.75 mg/L 48 hpf	0	0	0
0.75 mg/L 72 hpf 1.5 mg/L 48 hpf	0	0	0
0.75 mg/L 72 hpf 3 mg/L 48 hpf	0	0	0
0.75 mg/L 72 hpf Control 72 hpf	1	0	0
0.75 mg/L 72 hpf DMSO 72 hpf	0	0	0
0.75 mg/L 72 hpf 0.07 mg/L 72 hpf	1	0	0
0.75 mg/L 72 hpf 0.4 mg/L 72 hpf	0	0	0
1.5 mg/L 72 hpf Control 48 hpf	1	1	1
1.5 mg/L 72 hpf DMSO 48 hpf	1	0	0
1.5 mg/L 72 hpf 0.07 mg/L 48 hpf	1	0	0
1.5 mg/L 72 hpf 0.4 mg/L 48 hpf	0	0	0
1.5 mg/L 72 hpf 0.75 mg/L 48 hpf	0	0	0
1.5 mg/L 72 hpf 1.5 mg/L 48 hpf	0	0	0
1.5 mg/L 72 hpf 3 mg/L 48 hpf	0	0	0
1.5 mg/L 72 hpf Control 72 hpf	1	0	0
1.5 mg/L 72 hpf DMSO 72 hpf	1	0	0
1.5 mg/L 72 hpf 0.07 mg/L 72 hpf	1	0	0
1.5 mg/L 72 hpf 0.4 mg/L 72 hpf	1	1	1
1.5 mg/L 72 hpf 0.75 mg/L 72 hpf	0	0	0
3 mg/L 72 hpf Control 48 hpf	1	1	1
3 mg/L 72 hpf DMSO 48 hpf	1	0	0
3 mg/L 72 hpf 0.07 mg/L 48 hpf	1	0	0
3 mg/L 72 hpf 0.4 mg/L 48 hpf	1	0	0
3 mg/L 72 hpf 0.75 mg/L 48 hpf	1	1	1
3 mg/L 72 hpf 1.5 mg/L 48 hpf	1	0	0
3 mg/L 72 hpf 3 mg/L 48 hpf	1	0	0
3 mg/L 72 hpf Control 72 hpf	1	0	0
3 mg/L 72 hpf DMSO 72 hpf	1	0	0
3 mg/L 72 hpf 0.07 mg/L 72 hpf	1	0	0
3 mg/L 72 hpf 0.4 mg/L 72 hpf	1	0	0
3 mg/L 72 hpf 0.75 mg/L 72 hpf	1	0	0
3 mg/L 72 hpf 1.5 mg/L 72 hpf	1	0	0
Control 96 hpf Control 48 hpf	0	0	0
Control 96 hpf DMSO 48 hpf	0	0	0
Control 96 hpf 0.07 mg/L 48 hpf	0	0	0
Control 96 hpf 0.4 mg/L 48 hpf	1	0	0
Control 96 hpf 0.75 mg/L 48 hpf	1	0	0
Control 96 hpf 1.5 mg/L 48 hpf	1	0	0
Control 96 hpf 3 mg/L 48 hpf	1	1	1
Control 96 hpf Control 72 hpf	0	0	0
Control 96 hpf DMSO 72 hpf	0	0	0
Control 96 hpf 0.07 mg/L 72 hpf	0	0	0
Control 96 hpf 0.4 mg/L 72 hpf	0	0	0
Control 96 hpf 0.75 mg/L 72 hpf	1	0	0
Control 96 hpf 1.5 mg/L 72 hpf	1	0	0
Control 96 hpf 3 mg/L 72 hpf	1	0	0
DMSO 96 hpf Control 48 hpf	0	0	0
DMSO 96 hpf DMSO 48 hpf	0	0	0
DMSO 96 hpf 0.07 mg/L 48 hpf	0	0	0
DMSO 96 hpf 0.4 mg/L 48 hpf	1	0	0
DMSO 96 hpf 0.75 mg/L 48 hpf	1	0	0
DMSO 96 hpf 1.5 mg/L 48 hpf	1	0	0
DMSO 96 hpf 3 mg/L 48 hpf	1	0	0
DMSO 96 hpf Control 72 hpf	0	0	0
DMSO 96 hpf DMSO 72 hpf	1	1	1
DMSO 96 hpf 0.07 mg/L 72 hpf	0	0	0
DMSO 96 hpf 0.4 mg/L 72 hpf	1	1	1
DMSO 96 hpf 0.75 mg/L 72 hpf	1	0	0
DMSO 96 hpf 1.5 mg/L 72 hpf	1	0	0
DMSO 96 hpf 3 mg/L 72 hpf	1	0	0
DMSO 96 hpf Control 96 hpf	0	0	0
0.07 mg/L 96 hpf Control 48 hpf	0	0	0
0.07 mg/L 96 hpf DMSO 48 hpf	0	0	0
0.07 mg/L 96 hpf 0.07 mg/L 48 hpf	0	0	0
0.07 mg/L 96 hpf 0.4 mg/L 48 hpf	0	0	0
0.07 mg/L 96 hpf 0.75 mg/L 48 hpf	1	1	1
0.07 mg/L 96 hpf 1.5 mg/L 48 hpf	1	0	0
0.07 mg/L 96 hpf 3 mg/L 48 hpf	1	0	0
0.07 mg/L 96 hpf Control 72 hpf	0	0	0
0.07 mg/L 96 hpf DMSO 72 hpf	0	0	0
0.07 mg/L 96 hpf 0.07 mg/L 72 hpf	0	0	0
0.07 mg/L 96 hpf 0.4 mg/L 72 hpf	0	0	0
0.07 mg/L 96 hpf 0.75 mg/L 72 hpf	0	0	0
0.07 mg/L 96 hpf 1.5 mg/L 72 hpf	1	0	0
0.07 mg/L 96 hpf 3 mg/L 72 hpf	1	0	0
0.07 mg/L 96 hpf Control 96 hpf	0	0	0
0.07 mg/L 96 hpf DMSO 96 hpf	0	0	0
0.4 mg/L 96 hpf Control 48 hpf	0	0	0
0.4 mg/L 96 hpf DMSO 48 hpf	0	0	0
0.4 mg/L 96 hpf 0.07 mg/L 48 hpf	0	0	0
0.4 mg/L 96 hpf 0.4 mg/L 48 hpf	0	0	0
0.4 mg/L 96 hpf 0.75 mg/L 48 hpf	0	0	0
0.4 mg/L 96 hpf 1.5 mg/L 48 hpf	1	0	0
0.4 mg/L 96 hpf 3 mg/L 48 hpf	1	0	0
0.4 mg/L 96 hpf Control 72 hpf	0	0	0
0.4 mg/L 96 hpf DMSO 72 hpf	0	0	0
0.4 mg/L 96 hpf 0.07 mg/L 72 hpf	0	0	0
0.4 mg/L 96 hpf 0.4 mg/L 72 hpf	0	0	0
0.4 mg/L 96 hpf 0.75 mg/L 72 hpf	0	0	0
0.4 mg/L 96 hpf 1.5 mg/L 72 hpf	1	0	0
0.4 mg/L 96 hpf 3 mg/L 72 hpf	1	0	0
0.4 mg/L 96 hpf Control 96 hpf	0	0	0
0.4 mg/L 96 hpf DMSO 96 hpf	1	0	0
0.4 mg/L 96 hpf 0.07 mg/L 96 hpf	0	0	0
0.75 mg/L 96 hpf Control 48 hpf	1	1	1
0.75 mg/L 96 hpf DMSO 48 hpf	1	1	1
0.75 mg/L 96 hpf 0.07 mg/L 48 hpf	0	0	0
0.75 mg/L 96 hpf 0.4 mg/L 48 hpf	0	0	0
0.75 mg/L 96 hpf 0.75 mg/L 48 hpf	0	0	0
0.75 mg/L 96 hpf 1.5 mg/L 48 hpf	0	0	0
0.75 mg/L 96 hpf 3 mg/L 48 hpf	1	0	0
0.75 mg/L 96 hpf Control 72 hpf	1	0	0
0.75 mg/L 96 hpf DMSO 72 hpf	0	0	0
0.75 mg/L 96 hpf 0.07 mg/L 72 hpf	1	0	0
0.75 mg/L 96 hpf 0.4 mg/L 72 hpf	0	0	0
0.75 mg/L 96 hpf 0.75 mg/L 72 hpf	0	0	0
0.75 mg/L 96 hpf 1.5 mg/L 72 hpf	0	0	0
0.75 mg/L 96 hpf 3 mg/L 72 hpf	1	1	1
0.75 mg/L 96 hpf Control 96 hpf	1	1	1
0.75 mg/L 96 hpf DMSO 96 hpf	1	1	0
0.75 mg/L 96 hpf 0.07 mg/L 96 hpf	1	0	0
0.75 mg/L 96 hpf 0.4 mg/L 96 hpf	0	0	0
1.5 mg/L 96 hpf Control 48 hpf	1	0	0
1.5 mg/L 96 hpf DMSO 48 hpf	1	0	0
1.5 mg/L 96 hpf 0.07 mg/L 48 hpf	1	0	0
1.5 mg/L 96 hpf 0.4 mg/L 48 hpf	0	0	0
1.5 mg/L 96 hpf 0.75 mg/L 48 hpf	0	0	0
1.5 mg/L 96 hpf 1.5 mg/L 48 hpf	0	0	0
1.5 mg/L 96 hpf 3 mg/L 48 hpf	0	0	0
1.5 mg/L 96 hpf Control 72 hpf	1	1	0
1.5 mg/L 96 hpf DMSO 72 hpf	1	0	0
1.5 mg/L 96 hpf 0.07 mg/L 72 hpf	1	0	0
1.5 mg/L 96 hpf 0.4 mg/L 72 hpf	1	0	0
1.5 mg/L 96 hpf 0.75 mg/L 72 hpf	0	0	1
1.5 mg/L 96 hpf 1.5 mg/L 72 hpf	0	0	1
1.5 mg/L 96 hpf 3 mg/L 72 hpf	1	1	1
1.5 mg/L 96 hpf Control 96 hpf	1	1	1
1.5 mg/L 96 hpf DMSO 96 hpf	1	1	1
1.5 mg/L 96 hpf 0.07 mg/L 96 hpf	1	1	1
1.5 mg/L 96 hpf 0.4 mg/L 96 hpf	1	1	0
1.5 mg/L 96 hpf 0.75 mg/L 96 hpf	0	0	0
3 mg/L 96 hpf Control 48 hpf	1	0	0
3 mg/L 96 hpf DMSO 48 hpf	1	0	0
3 mg/L 96 hpf 0.07 mg/L 48 hpf	1	0	0
3 mg/L 96 hpf 0.4 mg/L 48 hpf	0	0	0
3 mg/L 96 hpf 0.75 mg/L 48 hpf	0	0	0
3 mg/L 96 hpf 1.5 mg/L 48 hpf	0	0	0
3 mg/L 96 hpf 3 mg/L 48 hpf	0	0	0
3 mg/L 96 hpf Control 72 hpf	1	0	0
3 mg/L 96 hpf DMSO 72 hpf	1	1	0
3 mg/L 96 hpf 0.07 mg/L 72 hpf	1	1	1
3 mg/L 96 hpf 0.4 mg/L 72 hpf	1	0	0
3 mg/L 96 hpf 0.75 mg/L 72 hpf	0	0	0
3 mg/L 96 hpf 1.5 mg/L 72 hpf	0	0	0
3 mg/L 96 hpf 3 mg/L 72 hpf	1	1	0
3 mg/L 96 hpf Control 96 hpf	1	0	0
3 mg/L 96 hpf DMSO 96 hpf	1	0	0
3 mg/L 96 hpf 0.07 mg/L 96 hpf	1	1	0
3 mg/L 96 hpf 0.4 mg/L 96 hpf	1	0	0
3 mg/L 96 hpf 0.75 mg/L 96 hpf	0	0	0
3 mg/L 96 hpf 1.5 mg/L 96 hpf	0	0	0

## Sheet: GST
Table S2. Results of Tukey test (after one-way ANOVA) on GST data. Significant differences between pairs are indicated by 1.
Comapaired pairs	Significance (p < 0.05)	Significance (p < 0.01)	Significance (p < 0.001)
Control 48 DMSO 48	0	0	0
Control 48 0,07 48	0	0	0
Control 48 0,4 48	0	0	0
Control 48 0,75 48	0	0	0
Control 48 1,5 48	0	0	0
Control 48 3 48	1	0	0
Control 48 Control 72	0	0	0
Control 48 DMSO 72	1	1	0
Control 48 0.07 72	1	0	0
Control 48 0.4 72	1	1	1
Control 48 0.75 72	1	1	1
Control 48 1.5 72	1	1	1
Control 48 3 72	1	1	1
Control 48 Control 96	1	1	1
Control 48 DMSO 96	1	1	1
Control 48 0.07 96	1	1	1
Control 48 0.4 96	1	1	1
Control 48 0.75 96	1	1	1
Control 48 1.5 96	1	1	1
Control 48 3 96	1	1	1
DMSO 48 0.07 48	0	0	0
DMSO 48 0.4 48	0	0	0
DMSO 48 0.75 48	0	0	0
DMSO 48 1.5 48	0	0	0
DMSO 48 3 48	1	0	0
DMSO 48 Control 72	1	0	0
DMSO 48 DMSO 72	1	1	0
DMSO 48 0.07 72	1	1	0
DMSO 48 0.4 72	1	1	1
DMSO 48 0.75 72	1	1	1
DMSO 48 1.5 72	1	1	1
DMSO 48 3 72	1	1	1
DMSO 48 Control 96	1	1	1
DMSO 48 DMSO 96	1	1	1
DMSO 48 0.07 96	1	1	1
DMSO 48 0.4 96	1	1	1
DMSO 48 0.75 96	1	1	1
DMSO 48 1.5 96	1	1	1
DMSO 48 3 96	1	1	1
0.07 48 0.4 48	0	0	0
0.07 48 0.75 48	0	0	0
0.07 48 1.5 48	0	0	0
0.07 48 3 48	0	0	0
0.07 48 Control 72	0	0	0
0.07 48 DMSO 72	1	0	0
0.07 48 0.07 72	1	0	0
0.07 48 0.4 72	1	1	1
0.07 48 0.75 72	1	1	1
0.07 48 1.5 72	1	1	1
0.07 48 3 72	1	1	1
0.07 48 Control 96	1	1	1
0.07 48 DMSO 96	1	1	1
0.07 48 0.07 96	1	1	1
0.07 48 0.4 96	1	1	1
0.07 48 0.75 96	1	1	1
0.07 48 1.5 96	1	1	1
0.07 48 3 96	1	1	1
0.4 48 0.75 48	0	0	0
0.4 48 1.5 48	0	0	0
0.4 48 3 48	0	0	0
0.4 48 Control 72	0	0	0
0.4 48 DMSO 72	1	1	0
0.4 48 0.07 72	1	0	0
0.4 48 0.4 72	1	1	1
0.4 48 0.75 72	1	1	1
0.4 48 1.5 72	1	1	1
0.4 48 3 72	1	1	1
0.4 48 Control 96	1	1	1
0.4 48 DMSO 96	1	1	1
0.4 48 0.07 96	1	1	1
0.4 48 0.4 96	1	1	1
0.4 48 0.75 96	1	1	1
0.4 48 1.5 96	1	1	1
0.4 48 3 96	1	1	1
0.75 48 1.5 48	0	0	0
0.75 48 3 48	0	0	0
0.75 48 Control 72	0	0	0
0.75 48 DMSO 72	1	0	0
0.75 48 0.07 72	0	0	0
0.75 48 0.4 72	1	1	1
0.75 48 0.75 72	1	1	1
0.75 48 1.5 72	1	1	1
0.75 48 3 72	1	1	1
0.75 48 Control 96	1	1	1
0.75 48 DMSO 96	1	1	1
0.75 48 0.07 96	1	1	1
0.75 48 0.4 96	1	1	1
0.75 48 0.75 96	1	1	1
0.75 48 1.5 96	1	1	1
0.75 48 3 96	1	1	1
1.5 48 3 48	0	0	0
1.5 48 Control 72	0	0	0
1.5 48 DMSO 72	1	0	0
1.5 48 0.07 72	0	0	0
1.5 48 0.4 72	1	1	1
1.5 48 0.75 72	1	1	1
1.5 48 1.5 72	1	1	1
1.5 48 3 72	1	1	1
1.5 48 Control 96	1	1	1
1.5 48 DMSO 96	1	1	1
1.5 48 0.07 96	1	1	1
1.5 48 0.4 96	1	1	1
1.5 48 0.75 96	1	1	1
1.5 48 1.5 96	1	1	1
1.5 48 3 96	1	1	1
3 48 Control 72	0	0	0
3 48 DMSO 72	1	1	0
3 48 0.07 72	1	0	0
3 48 0.4 72	1	1	1
3 48 0.75 72	1	1	1
3 48 1.5 72	1	1	1
3 48 3 72	1	1	1
3 48 Control 96	1	1	1
3 48 DMSO 96	1	1	1
3 48 0.07 96	1	1	1
3 48 0.4 96	1	1	1
3 48 0.75 96	1	1	1
3 48 1.5 96	1	1	1
3 48 3 96	1	1	1
Control 72 DMSO 72	0	0	0
Control 72 0.07 72	0	0	0
Control 72 0.4 72	1	0	0
Control 72 0.75 72	1	0	0
Control 72 1.5 72	1	1	0
Control 72 3 72	1	0	0
Control 72 Control 96	1	1	1
Control 72 DMSO 96	1	1	1
Control 72 0.07 96	1	1	1
Control 72 0.4 96	1	1	1
Control 72 0.75 96	1	1	1
Control 72 1.5 96	1	1	0
Control 72 3 96	1	1	1
DMSO 72 0.07 72	0	0	0
DMSO 72 0.4 72	1	0	0
DMSO 72 0.75 72	1	0	0
DMSO 72 1.5 72	1	0	0
DMSO 72 3 72	1	0	0
DMSO 72 Control 96	1	1	1
DMSO 72 DMSO 96	1	1	0
DMSO 72 0.07 96	1	1	1
DMSO 72 0.4 96	1	1	1
DMSO 72 0.75 96	1	1	0
DMSO 72 1.5 96	1	0	0
DMSO 72 3 96	1	1	0
0.07 72 0.4 72	0	0	0
0.07 72 0.75 72	0	0	0
0.07 72 1.5 72	1	0	0
0.07 72 3 72	1	0	0
0.07 72 Control 96	1	1	1
0.07 72 DMSO 96	1	1	0
0.07 72 0.07 96	1	1	1
0.07 72 0.4 96	1	1	1
0.07 72 0.75 96	1	1	1
0.07 72 1.5 96	1	0	0
0.07 72 3 96	1	1	1
0.4 72 0.75 72	0	0	0
0.4 72 1.5 72	0	0	0
0.4 72 3 72	0	0	0
0.4 72 Control 96	1	0	0
0.4 72 DMSO 96	0	0	0
0.4 72 0.07 96	0	0	0
0.4 72 0.4 96	1	0	0
0.4 72 0.75 96	0	0	0
0.4 72 1.5 96	0	0	0
0.4 72 3 96	0	0	0
0.75 72 1.5 72	0	0	0
0.75 72 3 72	0	0	0
0.75 72 Control 96	1	0	0
0.75 72 DMSO 96	0	0	0
0.75 72 0.07 96	0	0	0
0.75 72 0.4 96	1	0	0
0.75 72 0.75 96	0	0	0
0.75 72 1.5 96	0	0	0
0.75 72 3 96	0	0	0
1.5 72 3 72	0	0	0
1.5 72 Control 96	0	0	0
1.5 72 DMSO 96	0	0	0
1.5 72 0.07 96	0	0	0
1.5 72 0.4 96	0	0	0
1.5 72 0.75 96	0	0	0
1.5 72 1.5 96	0	0	0
1.5 72 3 96	0	0	0
3 72 Control 96	0	0	0
3 72 DMSO 96	0	0	0
3 72 0.07 96	0	0	0
3 72 0.4 96	0	0	0
3 72 0.75 96	0	0	0
3 72 1.5 96	0	0	0
3 72 3 96	0	0	0
Control 96 DMSO 96	0	0	0
Control 96 0.07 96	0	0	0
Control 96 0.4 96	0	0	0
Control 96 0.75 96	0	0	0
Control 96 1.5 96	0	0	0
Control 96 3 96	0	0	0
DMSO 96 0.07 96	0	0	0
DMSO 96 0.4 96	0	0	0
DMSO 96 0.75 96	0	0	0
DMSO 96 1.5 96	0	0	0
DMSO 96 3 96	0	0	0
0.07 96 0.4 96	0	0	0
0.07 96 0.75 96	0	0	0
0.07 96 1.5 96	0	0	0
0.07 96 3 96	0	0	0
0.4 96 0.75 96	0	0	0
0.4 96 1.5 96	0	0	0
0.4 96 3 96	0	0	0
0.75 96 1.5 96	0	0	0
0,75 96 3 96	0	0	0
1,5 96 3 96	0	0	0

## Sheet: SOD
Table S3. Results of Tukey test (after one-way ANOVA) on SOD data. Significant differences between pairs are indicated by 1.
Comapaired pairs	Significance (p < 0.05)	Significance (p < 0.01)	Significance (p < 0.001)
Control 48 DMSO 48	0	0	0
Control 48 0.07 48	0	0	0
Control 48 0.4 48	0	0	0
Control 48 0.75 48	1	0	0
Control 48 1.5 48	0	0	0
Control 48 3 48	1	1	1
Control 48 Control 72	0	0	0
Control 48 DMSO 72	0	0	0
Control 48 0.07 72	0	0	0
Control 48 0.4 72	0	0	0
Control 48 0.75 72	0	0	0
Control 48 1.5 72	0	0	0
Control 48 3 72	0	0	0
Control 48 Control 96	0	0	0
Control 48 DMSO 96	0	0	0
Control 48 0.07 96	0	0	0
Control 48 0.4 96	0	0	0
Control 48 0.75 96	0	0	0
Control 48 1.5 96	0	0	0
Control 48 3 96	0	0	0
DMSO 48 0.07 48	0	0	0
DMSO 48 0.4 48	0	0	0
DMSO 48 0.75 48	0	0	0
DMSO 48 1.5 48	0	0	0
DMSO 48 3 48	1	1	1
DMSO 48 Control 72	0	0	0
DMSO 48 DMSO 72	0	0	0
DMSO 48 0.07 72	1	0	0
DMSO 48 0.4 72	0	0	0
DMSO 48 0.75 72	0	0	0
DMSO 48 1.5 72	0	0	0
DMSO 48 3 72	0	0	0
DMSO 48 Control 96	0	0	0
DMSO 48 DMSO 96	0	0	0
DMSO 48 0.07 96	0	0	0
DMSO 48 0.4 96	0	0	0
DMSO 48 0.75 96	0	0	0
DMSO 48 1.5 96	0	0	0
DMSO 48 3 96	0	0	0
0.07 48 0.4 48	0	0	0
0.07 48 0.75 48	0	0	0
0.07 48 1.5 48	0	0	0
0.07 48 3 48	1	0	0
0.07 48 Control 72	0	0	0
0.07 48 DMSO 72	1	1	0
0.07 48 0.07 72	1	1	1
0.07 48 0.4 72	0	0	0
0.07 48 0.75 72	1	1	0
0.07 48 1.5 72	1	1	0
0.07 48 3 72	1	1	0
0.07 48 Control 96	0	0	0
0.07 48 DMSO 96	0	0	0
0.07 48 0.07 96	0	0	0
0.07 48 0.4 96	0	0	0
0.07 48 0.75 96	0	0	0
0.07 48 1.5 96	0	0	0
0.07 48 3 96	0	0	0
0.4 48 0.75 48	0	0	0
0.4 48 1.5 48	0	0	0
0.4 48 3 48	1	0	0
0.4 48 Control 72	0	0	0
0.4 48 DMSO 72	1	0	0
0.4 48 0.07 72	1	1	1
0.4 48 0.4 72	0	0	0
0.4 48 0.75 72	1	0	0
0.4 48 1.5 72	1	0	0
0.4 48 3 72	1	0	0
0.4 48 Control 96	0	0	0
0.4 48 DMSO 96	0	0	0
0.4 48 0.07 96	0	0	0
0.4 48 0.4 96	0	0	0
0.4 48 0.75 96	0	0	0
0.4 48 1.5 96	0	0	0
0.4 48 3 96	0	0	0
0.75 48 1.5 48	0	0	0
0.75 48 3 48	0	0	0
0.75 48 Control 72	1	0	0
0.75 48 DMSO 72	1	1	1
0.75 48 0.07 72	1	1	1
0.75 48 0.4 72	1	1	0
0.75 48 0.75 72	1	1	1
0.75 48 1.5 72	1	1	1
0.75 48 3 72	1	1	1
0.75 48 Control 96	1	0	0
0.75 48 DMSO 96	0	0	0
0.75 48 0.07 96	0	0	0
0.75 48 0.4 96	1	0	0
0.75 48 0.75 96	0	0	0
0.75 48 1.5 96	0	0	0
0.75 48 3 96	0	0	0
1.5 48 3 48	1	1	0
1.5 48 Control 72	0	0	0
1.5 48 DMSO 72	1	0	0
1.5 48 0.07 72	1	1	0
1.5 48 0.4 72	0	0	0
1.5 48 0.75 72	0	0	0
1.5 48 1.5 72	1	0	0
1.5 48 3 72	1	0	0
1.5 48 Control 96	0	0	0
1.5 48 DMSO 96	0	0	0
1.5 48 0.07 96	0	0	0
1.5 48 0.4 96	0	0	0
1.5 48 0.75 96	0	0	0
1.5 48 1.5 96	0	0	0
1.5 48 3 96	0	0	0
3 48 Control 72	1	1	1
3 48 DMSO 72	1	1	1
3 48 0.07 72	1	1	1
3 48 0.4 72	1	1	1
3 48 0.75 72	1	1	1
3 48 1.5 72	1	1	1
3 48 3 72	1	1	1
3 48 Control 96	1	1	1
3 48 DMSO 96	1	1	1
3 48 0.07 96	1	1	1
3 48 0.4 96	1	1	1
3 48 0.75 96	1	1	1
3 48 1.5 96	1	1	1
3 48 3 96	1	1	1
Control 72 DMSO 72	1	0	0
Control 72 0.07 72	1	0	0
Control 72 0.4 72	0	0	0
Control 72 0.75 72	0	0	0
Control 72 1.5 72	1	0	0
Control 72 3 72	1	0	0
Control 72 Control 96	0	0	0
Control 72 DMSO 96	0	0	0
Control 72 0.07 96	0	0	0
Control 72 0.4 96	0	0	0
Control 72 0.75 96	0	0	0
Control 72 1.5 96	0	0	0
Control 72 3 96	0	0	0
DMSO 72 0.07 72	0	0	0
DMSO 72 0.4 72	0	0	0
DMSO 72 0.75 72	0	0	0
DMSO 72 1.5 72	0	0	0
DMSO 72 3 72	0	0	0
DMSO 72 Control 96	0	0	0
DMSO 72 DMSO 96	0	0	0
DMSO 72 0.07 96	0	0	0
DMSO 72 0.4 96	0	0	0
DMSO 72 0.75 96	0	0	0
DMSO 72 1.5 96	0	0	0
DMSO 72 3 96	0	0	0
0.07 72 0.4 72	0	0	0
0.07 72 0.75 72	0	0	0
0.07 72 1.5 72	0	0	0
0.07 72 3 72	0	0	0
0.07 72 Control 96	0	0	0
0.07 72 DMSO 96	1	0	0
0.07 72 0.07 96	1	0	0
0.07 72 0.4 96	0	0	0
0.07 72 0.75 96	1	0	0
0.07 72 1.5 96	1	0	0
0.07 72 3 96	1	0	0
0.4 72 0.75 72	0	0	0
0.4 72 1.5 72	0	0	0
0.4 72 3 72	0	0	0
0.4 72 Control 96	0	0	0
0.4 72 DMSO 96	0	0	0
0.4 72 0.07 96	0	0	0
0.4 72 0.4 96	0	0	0
0.4 72 0.75 96	0	0	0
0.4 72 1.5 96	0	0	0
0.4 72 3 96	0	0	0
0.75 72 1.5 72	0	0	0
0.75 72 3 72	0	0	0
0.75 72 Control 96	0	0	0
0.75 72 DMSO 96	0	0	0
0.75 72 0.07 96	0	0	0
0.75 72 0.4 96	0	0	0
0.75 72 0.75 96	0	0	0
0.75 72 1.5 96	0	0	0
0.75 72 3 96	0	0	0
1.5 72 3 72	0	0	0
1.5 72 Control 96	0	0	0
1.5 72 DMSO 96	0	0	0
1.5 72 0.07 96	0	0	0
1.5 72 0.4 96	0	0	0
1.5 72 0.75 96	0	0	0
1.5 72 1.5 96	0	0	0
1.5 72 3 96	0	0	0
3 72 Control 96	0	0	0
3 72 DMSO 96	0	0	0
3 72 0.07 96	0	0	0
3 72 0.4 96	0	0	0
3 72 0.75 96	0	0	0
3 72 1.5 96	0	0	0
3 72 3 96	0	0	0
Control 96 DMSO 96	0	0	0
Control 96 0.07 96	0	0	0
Control 96 0.4 96	0	0	0
Control 96 0.75 96	0	0	0
Control 96 1.5 96	0	0	0
Control 96 3 96	0	0	0
DMSO 96 0.07 96	0	0	0
DMSO 96 0.4 96	0	0	0
DMSO 96 0.75 96	0	0	0
DMSO 96 1.5 96	0	0	0
DMSO 96 3 96	0	0	0
0.07 96 0.4 96	0	0	0
0.07 96 0.75 96	0	0	0
0.07 96 1.5 96	0	0	0
0.07 96 3 96	0	0	0
0.4 96 0.75 96	0	0	0
0.4 96 1.5 96	0	0	0
0.4 96 3 96	0	0	0
0.75 96 1.5 96	0	0	0
0.75 96 3 96	0	0	0
1.5 96 3 96	0	0	0

## Sheet: LPO
Table S4. Results of Tukey test (after one-way ANOVA) on LPO data. Significant differences between pairs are indicated by 1.
Comapaired pairs	Significance (p < 0.05)	Significance (p < 0.01)	Significance (p < 0.001)
control 48 DMSO 48	0	0	0
control 48 0.07 48	0	0	0
control 48 0.4 48	0	0	0
control 48 0.75 48	0	0	0
control 48 1.5 48	0	0	0
control 48 3 48	0	0	0
control 48 control 72	0	0	0
control 48 DMSO 72	1	0	0
control 48 0.07 72	0	0	0
control 48 0.4 72	0	0	0
control 48 0.75 72	1	1	1
control 48 1.5 72	0	0	0
control 48 3 72	0	0	0
control 48 control 96	1	0	0
control 48 DMSO 96	1	0	0
control 48 0.07 96	1	1	1
control 48 0.4 96	1	1	1
control 48 0.75 96	1	0	0
control 48 1.5 96	0	0	0
control 48 3 96	0	0	0
DMSO 48 0.07 48	0	0	0
DMSO 48 0.4 48	0	0	0
DMSO 48 0.75 48	0	0	0
DMSO 48 1.5 48	0	0	0
DMSO 48 3 48	0	0	0
DMSO 48 control 72	1	0	0
DMSO 48 DMSO 72	1	1	0
DMSO 48 0.07 72	0	0	0
DMSO 48 0.4 72	0	0	0
DMSO 48 0.75 72	1	1	1
DMSO 48 1.5 72	0	0	0
DMSO 48 3 72	0	0	0
DMSO 48 control 96	1	0	0
DMSO 48 DMSO 96	1	1	0
DMSO 48 0.07 96	1	1	1
DMSO 48 0.4 96	1	1	1
DMSO 48 0.75 96	1	0	0
DMSO 48 1.5 96	0	0	0
DMSO 48 3 96	0	0	0
0.07 48 0.4 48	0	0	0
0.07 48 0.75 48	0	0	0
0.07 48 1.5 48	0	0	0
0.07 48 3 48	1	0	0
0.07 48 control 72	1	1	0
0.07 48 DMSO 72	1	1	1
0.07 48 0.07 72	0	0	0
0.07 48 0.4 72	1	0	0
0.07 48 0.75 72	1	1	1
0.07 48 1.5 72	0	0	0
0.07 48 3 72	0	0	0
0.07 48 control 96	1	1	0
0.07 48 DMSO 96	1	1	1
0.07 48 0.07 96	1	1	1
0.07 48 0.4 96	1	1	1
0.07 48 0.75 96	1	1	0
0.07 48 1.5 96	0	0	0
0.07 48 3 96	1	0	0
0.4 48 0.75 48	0	0	0
0.4 48 1.5 48	0	0	0
0.4 48 3 48	0	0	0
0.4 48 control 72	0	0	0
0.4 48 DMSO 72	0	0	0
0.4 48 0.07 72	0	0	0
0.4 48 0.4 72	0	0	0
0.4 48 0.75 72	1	1	0
0.4 48 1.5 72	0	0	0
0.4 48 3 72	0	0	0
0.4 48 control 96	0	0	0
0.4 48 DMSO 96	0	0	0
0.4 48 0.07 96	1	1	0
0.4 48 0.4 96	1	1	1
0.4 48 0.75 96	0	0	0
0.4 48 1.5 96	0	0	0
0.4 48 3 96	0	0	0
0.75 48 1.5 48	0	0	0
0.75 48 3 48	0	0	0
0.75 48 control 72	0	0	0
0.75 48 DMSO 72	1	0	0
0.75 48 0.07 72	0	0	0
0.75 48 0.4 72	0	0	0
0.75 48 0.75 72	1	1	1
0.75 48 1.5 72	0	0	0
0.75 48 3 72	0	0	0
0.75 48 control 96	0	0	0
0.75 48 DMSO 96	1	0	0
0.75 48 0.07 96	1	1	1
0.75 48 0.4 96	1	1	1
0.75 48 0.75 96	0	0	0
0.75 48 1.5 96	0	0	0
0.75 48 3 96	0	0	0
1.5 48 3 48	0	0	0
1.5 48 control 72	0	0	0
1.5 48 DMSO 72	0	0	0
1.5 48 0.07 72	0	0	0
1.5 48 0.4 72	0	0	0
1.5 48 0.75 72	1	1	0
1.5 48 1.5 72	0	0	0
1.5 48 3 72	0	0	0
1.5 48 control 96	0	0	0
1.5 48 DMSO 96	0	0	0
1.5 48 0.07 96	1	0	0
1.5 48 0.4 96	1	1	1
1.5 48 0.75 96	0	0	0
1.5 48 1.5 96	0	0	0
1.5 48 3 96	0	0	0
3 48 control 72	0	0	0
3 48 DMSO 72	0	0	0
3 48 0.07 72	0	0	0
3 48 0.4 72	0	0	0
3 48 0.75 72	0	0	0
3 48 1.5 72	0	0	0
3 48 3 72	0	0	0
3 48 control 96	0	0	0
3 48 DMSO 96	0	0	0
3 48 0.07 96	0	0	0
3 48 0.4 96	1	1	1
3 48 0.75 96	0	0	0
3 48 1.5 96	0	0	0
3 48 3 96	0	0	0
control 72 DMSO 72	0	0	0
control 72 0.07 72	0	0	0
control 72 0.4 72	0	0	0
control 72 0.75 72	0	0	0
control 72 1.5 72	0	0	0
control 72 3 72	0	0	0
control 72 control 96	0	0	0
control 72 DMSO 96	0	0	0
control 72 0.07 96	0	0	0
control 72 0.4 96	1	1	0
control 72 0.75 96	0	0	0
control 72 1.5 96	0	0	0
control 72 3 96	0	0	0
DMSO 72 0.07 72	0	0	0
DMSO 72 0.4 72	0	0	0
DMSO 72 0.75 72	0	0	0
DMSO 72 1.5 72	1	0	0
DMSO 72 3 72	1	0	0
DMSO 72 control 96	0	0	0
DMSO 72 DMSO 96	0	0	0
DMSO 72 0.07 96	0	0	0
DMSO 72 0.4 96	0	0	0
DMSO 72 0.75 96	0	0	0
DMSO 72 1.5 96	0	0	0
DMSO 72 3 96	0	0	0
0.07 72 0.4 72	0	0	0
0.07 72 0.75 72	0	1	0
0.07 72 1.5 72	0	0	0
0.07 72 3 72	0	0	0
0.07 72 control 96	0	0	0
0.07 72 DMSO 96	0	0	0
0.07 72 0.07 96	1	1	0
0.07 72 0.4 96	1	1	1
0.07 72 0.75 96	0	0	0
0.07 72 1.5 96	0	0	0
0.07 72 3 96	0	0	0
0.4 72 0.75 72	0	0	0
0.4 72 1.5 72	0	0	0
0.4 72 3 72	0	0	0
0.4 72 control 96	0	0	0
0.4 72 DMSO 96	0	0	0
0.4 72 0.07 96	0	0	0
0.4 72 0.4 96	1	1	0
0.4 72 0.75 96	0	0	0
0.4 72 1.5 96	0	0	0
0.4 72 3 96	0	0	0
0.75 72 1.5 72	1	1	1
0.75 72 3 72	1	1	0
0.75 72 control 96	0	0	0
0.75 72 DMSO 96	0	0	0
0.75 72 0.07 96	0	0	0
0.75 72 0.4 96	0	0	0
0.75 72 0.75 96	0	0	0
0.75 72 1.5 96	1	0	0
0.75 72 3 96	0	0	0
1.5 72 3 72	0	0	0
1.5 72 control 96	0	0	0
1.5 72 DMSO 96	1	0	0
1.5 72 0.07 96	1	1	0
1.5 72 0.4 96	1	1	1
1.5 72 0.75 96	0	0	0
1.5 72 1.5 96	0	0	0
1.5 72 3 96	0	0	0
3 72 control 96	0	0	0
3 72 DMSO 96	0	0	0
3 72 0.07 96	1	1	0
3 72 0.4 96	1	1	1
3 72 0.75 96	0	0	0
3 72 1.5 96	0	0	0
3 72 3 96	0	0	0
control 96 DMSO 96	0	0	0
control 96 0.07 96	0	0	0
control 96 0.4 96	1	0	0
control 96 0.75 96	0	0	0
control 96 1.5 96	0	0	0
control 96 3 96	0	0	0
DMSO 96 0.07 96	0	0	0
DMSO 96 0.4 96	1	0	0
DMSO 96 0.75 96	0	0	0
DMSO 96 1.5 96	0	0	0
DMSO 96 3 96	0	0	0
0.07 96 0.4 96	0	0	0
0.07 96 0.75 96	0	0	0
0.07 96 1.5 96	0	0	0
0.07 96 3 96	0	0	0
0.4 96 0.75 96	1	0	0
0.4 96 1.5 96	1	1	1
0.4 96 3 96	1	1	0
0.75 96 1.5 96	0	0	0
0.75 96 3 96	0	0	0
1.5 96 3 96	0	0	0

## Sheet: CAT
Table S5. Results of Tukey test (after one-way ANOVA) on CAT data. Significant differences between pairs are indicated by 1.
Comapaired pairs	Significance (p < 0.05)	Significance (p < 0.01)	Significance (p < 0.001)
DMSO 48 hpf Control 48 hpf	0	0	0
0.07 mg/L 48 hpf Control 48 hpf	0	0	0
0.07 mg/L 48 hpf DMSO 48 hpf	0	0	0
0.4 mg/L 48 hpf Control 48 hpf	0	0	0
0.4 mg/L 48 hpf DMSO 48 hpf	0	0	0
0.4 mg/L 48 hpf 0.07 mg/L 48 hpf	0	0	0
0.75 mg/L 48 hpf Control 48 hpf	0	0	0
0.75 mg/L 48 hpf DMSO 48 hpf	0	0	0
0.75 mg/L 48 hpf 0.07 mg/L 48 hpf	0	0	0
0.75 mg/L 48 hpf 0.4 mg/L 48 hpf	0	0	0
1.5 mg/L 48 hpf Control 48 hpf	0	0	0
1.5 mg/L 48 hpf DMSO 48 hpf	0	0	0
1.5 mg/L 48 hpf 0.07 mg/L 48 hpf	0	0	0
1.5 mg/L 48 hpf 0.4 mg/L 48 hpf	0	0	0
1.5 mg/L 48 hpf 0.75 mg/L 48 hpf	0	0	0
3 mg/L 48 hpf Control 48 hpf	0	0	0
3 mg/L 48 hpf DMSO 48 hpf	0	0	0
3 mg/L 48 hpf 0.07 mg/L 48 hpf	0	0	0
3 mg/L 48 hpf 0.4 mg/L 48 hpf	0	0	0
3 mg/L 48 hpf 0.75 mg/L 48 hpf	0	0	0
3 mg/L 48 hpf 1.5 mg/L 48 hpf	0	0	0
Control 72 hpf Control 48 hpf	0	0	0
Control 72 hpf DMSO 48 hpf	0	0	0
Control 72 hpf 0.07 mg/L 48 hpf	0	0	0
Control 72 hpf 0.4 mg/L 48 hpf	0	0	0
Control 72 hpf 0.75 mg/L 48 hpf	0	0	0
Control 72 hpf 1.5 mg/L 48 hpf	0	0	0
Control 72 hpf 3 mg/L 48 hpf	0	0	0
DMSO 72 hpf Control 48 hpf	0	0	0
DMSO 72 hpf DMSO 48 hpf	0	0	0
DMSO 72 hpf 0.07 mg/L 48 hpf	0	0	0
DMSO 72 hpf 0.4 mg/L 48 hpf	0	0	0
DMSO 72 hpf 0.75 mg/L 48 hpf	0	0	0
DMSO 72 hpf 1.5 mg/L 48 hpf	0	0	0
DMSO 72 hpf 3 mg/L 48 hpf	0	0	0
DMSO 72 hpf Control 72 hpf	0	0	0
0.07 mg/L 72 hpf Control 48 hpf	0	0	0
0.07 mg/L 72 hpf DMSO 48 hpf	0	0	0
0.07 mg/L 72 hpf 0.07 mg/L 48 hpf	0	0	0
0.07 mg/L 72 hpf 0.4 mg/L 48 hpf	0	0	0
0.07 mg/L 72 hpf 0.75 mg/L 48 hpf	0	0	0
0.07 mg/L 72 hpf 1.5 mg/L 48 hpf	0	0	0
0.07 mg/L 72 hpf 3 mg/L 48 hpf	0	0	0
0.07 mg/L 72 hpf Control 72 hpf	0	0	0
0.07 mg/L 72 hpf DMSO 72 hpf	0	0	0
0.4 mg/L 72 hpf Control 48 hpf	0	0	0
0.4 mg/L 72 hpf DMSO 48 hpf	0	0	0
0.4 mg/L 72 hpf 0.07 mg/L 48 hpf	0	0	0
0.4 mg/L 72 hpf 0.4 mg/L 48 hpf	0	0	0
0.4 mg/L 72 hpf 0.75 mg/L 48 hpf	0	0	0
0.4 mg/L 72 hpf 1.5 mg/L 48 hpf	0	0	0
0.4 mg/L 72 hpf 3 mg/L 48 hpf	0	0	0
0.4 mg/L 72 hpf Control 72 hpf	0	0	0
0.4 mg/L 72 hpf DMSO 72 hpf	0	0	0
0.4 mg/L 72 hpf 0.07 mg/L 72 hpf	0	0	0
0.75 mg/L 72 hpf Control 48 hpf	0	0	0
0.75 mg/L 72 hpf DMSO 48 hpf	0	0	0
0.75 mg/L 72 hpf 0.07 mg/L 48 hpf	0	0	0
0.75 mg/L 72 hpf 0.4 mg/L 48 hpf	0	0	0
0.75 mg/L 72 hpf 0.75 mg/L 48 hpf	0	0	0
0.75 mg/L 72 hpf 1.5 mg/L 48 hpf	0	0	0
0.75 mg/L 72 hpf 3 mg/L 48 hpf	0	0	0
0.75 mg/L 72 hpf Control 72 hpf	0	0	0
0.75 mg/L 72 hpf DMSO 72 hpf	0	0	0
0.75 mg/L 72 hpf 0.07 mg/L 72 hpf	0	0	0
0.75 mg/L 72 hpf 0.4 mg/L 72 hpf	0	0	0
1.5 mg/L 72 hpf Control 48 hpf	0	0	0
1.5 mg/L 72 hpf DMSO 48 hpf	0	0	0
1.5 mg/L 72 hpf 0.07 mg/L 48 hpf	0	0	0
1.5 mg/L 72 hpf 0.4 mg/L 48 hpf	0	0	0
1.5 mg/L 72 hpf 0.75 mg/L 48 hpf	0	0	0
1.5 mg/L 72 hpf 1.5 mg/L 48 hpf	0	0	0
1.5 mg/L 72 hpf 3 mg/L 48 hpf	0	0	0
1.5 mg/L 72 hpf Control 72 hpf	0	0	0
1.5 mg/L 72 hpf DMSO 72 hpf	0	0	0
1.5 mg/L 72 hpf 0.07 mg/L 72 hpf	0	0	0
1.5 mg/L 72 hpf 0.4 mg/L 72 hpf	0	0	0
1.5 mg/L 72 hpf 0.75 mg/L 72 hpf	0	0	0
3 mg/L 72 hpf Control 48 hpf	0	0	0
3 mg/L 72 hpf DMSO 48 hpf	0	0	0
3 mg/L 72 hpf 0.07 mg/L 48 hpf	0	0	0
3 mg/L 72 hpf 0.4 mg/L 48 hpf	0	0	0
3 mg/L 72 hpf 0.75 mg/L 48 hpf	0	0	0
3 mg/L 72 hpf 1.5 mg/L 48 hpf	0	0	0
3 mg/L 72 hpf 3 mg/L 48 hpf	0	0	0
3 mg/L 72 hpf Control 72 hpf	0	0	0
3 mg/L 72 hpf DMSO 72 hpf	0	0	0
3 mg/L 72 hpf 0.07 mg/L 72 hpf	0	0	0
3 mg/L 72 hpf 0.4 mg/L 72 hpf	0	0	0
3 mg/L 72 hpf 0.75 mg/L 72 hpf	0	0	0
3 mg/L 72 hpf 1.5 mg/L 72 hpf	0	0	0
Control 96 hpf Control 48 hpf	0	0	0
Control 96 hpf DMSO 48 hpf	0	0	0
Control 96 hpf 0.07 mg/L 48 hpf	0	0	0
Control 96 hpf 0.4 mg/L 48 hpf	0	0	0
Control 96 hpf 0.75 mg/L 48 hpf	0	0	0
Control 96 hpf 1.5 mg/L 48 hpf	0	0	0
Control 96 hpf 3 mg/L 48 hpf	0	0	0
Control 96 hpf Control 72 hpf	0	0	0
Control 96 hpf DMSO 72 hpf	0	0	0
Control 96 hpf 0.07 mg/L 72 hpf	0	0	0
Control 96 hpf 0.4 mg/L 72 hpf	0	0	0
Control 96 hpf 0.75 mg/L 72 hpf	0	0	0
Control 96 hpf 1.5 mg/L 72 hpf	0	0	0
Control 96 hpf 3 mg/L 72 hpf	0	0	0
DMSO 96 hpf Control 48 hpf	0	0	0
DMSO 96 hpf DMSO 48 hpf	0	0	0
DMSO 96 hpf 0.07 mg/L 48 hpf	0	0	0
DMSO 96 hpf 0.4 mg/L 48 hpf	0	0	0
DMSO 96 hpf 0.75 mg/L 48 hpf	0	0	0
DMSO 96 hpf 1.5 mg/L 48 hpf	0	0	0
DMSO 96 hpf 3 mg/L 48 hpf	0	0	0
DMSO 96 hpf Control 72 hpf	0	0	0
DMSO 96 hpf DMSO 72 hpf	0	0	0
DMSO 96 hpf 0.07 mg/L 72 hpf	0	0	0
DMSO 96 hpf 0.4 mg/L 72 hpf	0	0	0
DMSO 96 hpf 0.75 mg/L 72 hpf	0	0	0
DMSO 96 hpf 1.5 mg/L 72 hpf	0	0	0
DMSO 96 hpf 3 mg/L 72 hpf	0	0	0
DMSO 96 hpf Control 96 hpf	0	0	0
0.07 mg/L 96 hpf Control 48 hpf	0	0	0
0.07 mg/L 96 hpf DMSO 48 hpf	0	0	0
0.07 mg/L 96 hpf 0.07 mg/L 48 hpf	0	0	0
0.07 mg/L 96 hpf 0.4 mg/L 48 hpf	0	0	0
0.07 mg/L 96 hpf 0.75 mg/L 48 hpf	0	0	0
0.07 mg/L 96 hpf 1.5 mg/L 48 hpf	0	0	0
0.07 mg/L 96 hpf 3 mg/L 48 hpf	0	0	0
0.07 mg/L 96 hpf Control 72 hpf	0	0	0
0.07 mg/L 96 hpf DMSO 72 hpf	0	0	0
0.07 mg/L 96 hpf 0.07 mg/L 72 hpf	0	0	0
0.07 mg/L 96 hpf 0.4 mg/L 72 hpf	0	0	0
0.07 mg/L 96 hpf 0.75 mg/L 72 hpf	0	0	0
0.07 mg/L 96 hpf 1.5 mg/L 72 hpf	0	0	0
0.07 mg/L 96 hpf 3 mg/L 72 hpf	0	0	0
0.07 mg/L 96 hpf Control 96 hpf	0	0	0
0.07 mg/L 96 hpf DMSO 96 hpf	0	0	0
0.4 mg/L 96 hpf Control 48 hpf	0	0	0
0.4 mg/L 96 hpf DMSO 48 hpf	0	0	0
0.4 mg/L 96 hpf 0.07 mg/L 48 hpf	0	0	0
0.4 mg/L 96 hpf 0.4 mg/L 48 hpf	0	0	0
0.4 mg/L 96 hpf 0.75 mg/L 48 hpf	0	0	0
0.4 mg/L 96 hpf 1.5 mg/L 48 hpf	0	0	0
0.4 mg/L 96 hpf 3 mg/L 48 hpf	0	0	0
0.4 mg/L 96 hpf Control 72 hpf	0	0	0
0.4 mg/L 96 hpf DMSO 72 hpf	0	0	0
0.4 mg/L 96 hpf 0.07 mg/L 72 hpf	0	0	0
0.4 mg/L 96 hpf 0.4 mg/L 72 hpf	0	0	0
0.4 mg/L 96 hpf 0.75 mg/L 72 hpf	0	0	0
0.4 mg/L 96 hpf 1.5 mg/L 72 hpf	0	0	0
0.4 mg/L 96 hpf 3 mg/L 72 hpf	0	0	0
0.4 mg/L 96 hpf Control 96 hpf	1	0	0
0.4 mg/L 96 hpf DMSO 96 hpf	1	0	0
0.4 mg/L 96 hpf 0.07 mg/L 96 hpf	0	0	0
0.75 mg/L 96 hpf Control 48 hpf	0	0	0
0.75 mg/L 96 hpf DMSO 48 hpf	0	0	0
0.75 mg/L 96 hpf 0.07 mg/L 48 hpf	0	0	0
0.75 mg/L 96 hpf 0.4 mg/L 48 hpf	0	0	0
0.75 mg/L 96 hpf 0.75 mg/L 48 hpf	0	0	0
0.75 mg/L 96 hpf 1.5 mg/L 48 hpf	0	0	0
0.75 mg/L 96 hpf 3 mg/L 48 hpf	0	0	0
0.75 mg/L 96 hpf Control 72 hpf	0	0	0
0.75 mg/L 96 hpf DMSO 72 hpf	0	0	0
0.75 mg/L 96 hpf 0.07 mg/L 72 hpf	0	0	0
0.75 mg/L 96 hpf 0.4 mg/L 72 hpf	0	0	0
0.75 mg/L 96 hpf 0.75 mg/L 72 hpf	0	0	0
0.75 mg/L 96 hpf 1.5 mg/L 72 hpf	0	0	0
0.75 mg/L 96 hpf 3 mg/L 72 hpf	0	0	0
0.75 mg/L 96 hpf Control 96 hpf	0	0	0
0.75 mg/L 96 hpf DMSO 96 hpf	0	0	0
0.75 mg/L 96 hpf 0.07 mg/L 96 hpf	0	0	0
0.75 mg/L 96 hpf 0.4 mg/L 96 hpf	0	0	0
1.5 mg/L 96 hpf Control 48 hpf	0	0	0
1.5 mg/L 96 hpf DMSO 48 hpf	0	0	0
1.5 mg/L 96 hpf 0.07 mg/L 48 hpf	0	0	0
1.5 mg/L 96 hpf 0.4 mg/L 48 hpf	0	0	0
1.5 mg/L 96 hpf 0.75 mg/L 48 hpf	0	0	0
1.5 mg/L 96 hpf 1.5 mg/L 48 hpf	0	0	0
1.5 mg/L 96 hpf 3 mg/L 48 hpf	0	0	0
1.5 mg/L 96 hpf Control 72 hpf	0	0	0
1.5 mg/L 96 hpf DMSO 72 hpf	0	0	0
1.5 mg/L 96 hpf 0.07 mg/L 72 hpf	0	0	0
1.5 mg/L 96 hpf 0.4 mg/L 72 hpf	0	0	0
1.5 mg/L 96 hpf 0.75 mg/L 72 hpf	0	0	0
1.5 mg/L 96 hpf 1.5 mg/L 72 hpf	0	0	0
1.5 mg/L 96 hpf 3 mg/L 72 hpf	0	0	0
1.5 mg/L 96 hpf Control 96 hpf	0	0	0
1.5 mg/L 96 hpf DMSO 96 hpf	0	0	0
1.5 mg/L 96 hpf 0.07 mg/L 96 hpf	0	0	0
1.5 mg/L 96 hpf 0.4 mg/L 96 hpf	0	0	0
1.5 mg/L 96 hpf 0.75 mg/L 96 hpf	0	0	0
3 mg/L 96 hpf Control 48 hpf	1	0	0
3 mg/L 96 hpf DMSO 48 hpf	1	0	0
3 mg/L 96 hpf 0.07 mg/L 48 hpf	1	0	0
3 mg/L 96 hpf 0.4 mg/L 48 hpf	1	0	0
3 mg/L 96 hpf 0.75 mg/L 48 hpf	1	0	0
3 mg/L 96 hpf 1.5 mg/L 48 hpf	1	0	0
3 mg/L 96 hpf 3 mg/L 48 hpf	1	0	0
3 mg/L 96 hpf Control 72 hpf	1	0	0
3 mg/L 96 hpf DMSO 72 hpf	1	0	0
3 mg/L 96 hpf 0.07 mg/L 72 hpf	1	0	0
3 mg/L 96 hpf 0.4 mg/L 72 hpf	1	0	0
3 mg/L 96 hpf 0.75 mg/L 72 hpf	1	0	0
3 mg/L 96 hpf 1.5 mg/L 72 hpf	1	0	0
3 mg/L 96 hpf 3 mg/L 72 hpf	1	0	0
3 mg/L 96 hpf Control 96 hpf	1	0	0
3 mg/L 96 hpf DMSO 96 hpf	1	0	0
3 mg/L 96 hpf 0.07 mg/L 96 hpf	0	0	0
3 mg/L 96 hpf 0.4 mg/L 96 hpf	1	0	0
3 mg/L 96 hpf 0.75 mg/L 96 hpf	0	0	0
3 mg/L 96 hpf 1.5 mg/L 96 hpf	0	0	0

## Sheet: GPxSe
Table S6. Results of Tukey test (after one-way ANOVA) on GPxSe. Significant differences between pairs are indicated by 1.
Comapaired pairs	Significance (p < 0.05)	Significance (p < 0.01)	Significance (p < 0.001)
DMSO 48 hpf Control 48 hpf	0	0	0
0.07 mg/L 48 hpf Control 48 hpf	0	0	0
0.07 mg/L 48 hpf DMSO 48 hpf	0	0	0
0.4 mg/L 48 hpf Control 48 hpf	0	0	0
0.4 mg/L 48 hpf DMSO 48 hpf	0	0	0
0.4 mg/L 48 hpf 0.07 mg/L 48 hpf	0	0	0
0.75 mg/L 48 hpf Control 48 hpf	1	0	0
0.75 mg/L 48 hpf DMSO 48 hpf	1	0	0
0.75 mg/L 48 hpf 0.07 mg/L 48 hpf	0	0	0
0.75 mg/L 48 hpf 0.4 mg/L 48 hpf	0	0	0
1.5 mg/L 48 hpf Control 48 hpf	0	0	0
1.5 mg/L 48 hpf DMSO 48 hpf	0	0	0
1.5 mg/L 48 hpf 0.07 mg/L 48 hpf	0	0	0
1.5 mg/L 48 hpf 0.4 mg/L 48 hpf	0	0	0
1.5 mg/L 48 hpf 0.75 mg/L 48 hpf	0	0	0
3 mg/L 48 hpf Control 48 hpf	0	0	0
3 mg/L 48 hpf DMSO 48 hpf	0	0	0
3 mg/L 48 hpf 0.07 mg/L 48 hpf	0	0	0
3 mg/L 48 hpf 0.4 mg/L 48 hpf	0	0	0
3 mg/L 48 hpf 0.75 mg/L 48 hpf	0	0	0
3 mg/L 48 hpf 1.5 mg/L 48 hpf	0	0	0
Control 72 hpf Control 48 hpf	0	0	0
Control 72 hpf DMSO 48 hpf	0	0	0
Control 72 hpf 0.07 mg/L 48 hpf	0	0	0
Control 72 hpf 0.4 mg/L 48 hpf	0	0	0
Control 72 hpf 0.75 mg/L 48 hpf	0	0	0
Control 72 hpf 1.5 mg/L 48 hpf	0	0	0
Control 72 hpf 3 mg/L 48 hpf	0	0	0
DMSO 72 hpf Control 48 hpf	0	0	0
DMSO 72 hpf DMSO 48 hpf	0	0	0
DMSO 72 hpf 0.07 mg/L 48 hpf	0	0	0
DMSO 72 hpf 0.4 mg/L 48 hpf	0	0	0
DMSO 72 hpf 0.75 mg/L 48 hpf	0	0	0
DMSO 72 hpf 1.5 mg/L 48 hpf	0	0	0
DMSO 72 hpf 3 mg/L 48 hpf	0	0	0
DMSO 72 hpf Control 72 hpf	0	0	0
0.07 mg/L 72 hpf Control 48 hpf	0	0	0
0.07 mg/L 72 hpf DMSO 48 hpf	0	0	0
0.07 mg/L 72 hpf 0.07 mg/L 48 hpf	0	0	0
0.07 mg/L 72 hpf 0.4 mg/L 48 hpf	0	0	0
0.07 mg/L 72 hpf 0.75 mg/L 48 hpf	0	0	0
0.07 mg/L 72 hpf 1.5 mg/L 48 hpf	0	0	0
0.07 mg/L 72 hpf 3 mg/L 48 hpf	0	0	0
0.07 mg/L 72 hpf Control 72 hpf	0	0	0
0.07 mg/L 72 hpf DMSO 72 hpf	0	0	0
0.4 mg/L 72 hpf Control 48 hpf	0	0	0
0.4 mg/L 72 hpf DMSO 48 hpf	0	0	0
0.4 mg/L 72 hpf 0.07 mg/L 48 hpf	0	0	0
0.4 mg/L 72 hpf 0.4 mg/L 48 hpf	0	0	0
0.4 mg/L 72 hpf 0.75 mg/L 48 hpf	0	0	0
0.4 mg/L 72 hpf 1.5 mg/L 48 hpf	0	0	0
0.4 mg/L 72 hpf 3 mg/L 48 hpf	0	0	0
0.4 mg/L 72 hpf Control 72 hpf	0	0	0
0.4 mg/L 72 hpf DMSO 72 hpf	0	0	0
0.4 mg/L 72 hpf 0.07 mg/L 72 hpf	0	0	0
0.75 mg/L 72 hpf Control 48 hpf	0	0	0
0.75 mg/L 72 hpf DMSO 48 hpf	0	0	0
0.75 mg/L 72 hpf 0.07 mg/L 48 hpf	0	0	0
0.75 mg/L 72 hpf 0.4 mg/L 48 hpf	0	0	0
0.75 mg/L 72 hpf 0.75 mg/L 48 hpf	0	0	0
0.75 mg/L 72 hpf 1.5 mg/L 48 hpf	0	0	0
0.75 mg/L 72 hpf 3 mg/L 48 hpf	0	0	0
0.75 mg/L 72 hpf Control 72 hpf	0	0	0
0.75 mg/L 72 hpf DMSO 72 hpf	0	0	0
0.75 mg/L 72 hpf 0.07 mg/L 72 hpf	0	0	0
0.75 mg/L 72 hpf 0.4 mg/L 72 hpf	0	0	0
1.5 mg/L 72 hpf Control 48 hpf	0	0	0
1.5 mg/L 72 hpf DMSO 48 hpf	0	0	0
1.5 mg/L 72 hpf 0.07 mg/L 48 hpf	0	0	0
1.5 mg/L 72 hpf 0.4 mg/L 48 hpf	0	0	0
1.5 mg/L 72 hpf 0.75 mg/L 48 hpf	0	0	0
1.5 mg/L 72 hpf 1.5 mg/L 48 hpf	0	0	0
1.5 mg/L 72 hpf 3 mg/L 48 hpf	0	0	0
1.5 mg/L 72 hpf Control 72 hpf	0	0	0
1.5 mg/L 72 hpf DMSO 72 hpf	0	0	0
1.5 mg/L 72 hpf 0.07 mg/L 72 hpf	0	0	0
1.5 mg/L 72 hpf 0.4 mg/L 72 hpf	0	0	0
1.5 mg/L 72 hpf 0.75 mg/L 72 hpf	0	0	0
3 mg/L 72 hpf Control 48 hpf	0	0	0
3 mg/L 72 hpf DMSO 48 hpf	0	0	0
3 mg/L 72 hpf 0.07 mg/L 48 hpf	0	0	0
3 mg/L 72 hpf 0.4 mg/L 48 hpf	0	0	0
3 mg/L 72 hpf 0.75 mg/L 48 hpf	0	0	0
3 mg/L 72 hpf 1.5 mg/L 48 hpf	0	0	0
3 mg/L 72 hpf 3 mg/L 48 hpf	0	0	0
3 mg/L 72 hpf Control 72 hpf	1	0	0
3 mg/L 72 hpf DMSO 72 hpf	1	0	0
3 mg/L 72 hpf 0.07 mg/L 72 hpf	0	0	0
3 mg/L 72 hpf 0.4 mg/L 72 hpf	0	0	0
3 mg/L 72 hpf 0.75 mg/L 72 hpf	0	0	0
3 mg/L 72 hpf 1.5 mg/L 72 hpf	0	0	0
Control 96 hpf Control 48 hpf	0	0	0
Control 96 hpf DMSO 48 hpf	0	0	0
Control 96 hpf 0.07 mg/L 48 hpf	0	0	0
Control 96 hpf 0.4 mg/L 48 hpf	0	0	0
Control 96 hpf 0.75 mg/L 48 hpf	0	0	0
Control 96 hpf 1.5 mg/L 48 hpf	0	0	0
Control 96 hpf 3 mg/L 48 hpf	0	0	0
Control 96 hpf Control 72 hpf	0	0	0
Control 96 hpf DMSO 72 hpf	0	0	0
Control 96 hpf 0.07 mg/L 72 hpf	0	0	0
Control 96 hpf 0.4 mg/L 72 hpf	0	0	0
Control 96 hpf 0.75 mg/L 72 hpf	0	0	0
Control 96 hpf 1.5 mg/L 72 hpf	0	0	0
Control 96 hpf 3 mg/L 72 hpf	0	0	0
DMSO 96 hpf Control 48 hpf	0	0	0
DMSO 96 hpf DMSO 48 hpf	0	0	0
DMSO 96 hpf 0.07 mg/L 48 hpf	0	0	0
DMSO 96 hpf 0.4 mg/L 48 hpf	0	0	0
DMSO 96 hpf 0.75 mg/L 48 hpf	0	0	0
DMSO 96 hpf 1.5 mg/L 48 hpf	0	0	0
DMSO 96 hpf 3 mg/L 48 hpf	0	0	0
DMSO 96 hpf Control 72 hpf	0	0	0
DMSO 96 hpf DMSO 72 hpf	0	0	0
DMSO 96 hpf 0.07 mg/L 72 hpf	0	0	0
DMSO 96 hpf 0.4 mg/L 72 hpf	0	0	0
DMSO 96 hpf 0.75 mg/L 72 hpf	0	0	0
DMSO 96 hpf 1.5 mg/L 72 hpf	0	0	0
DMSO 96 hpf 3 mg/L 72 hpf	0	0	0
DMSO 96 hpf Control 96 hpf	0	0	0
0.07 mg/L 96 hpf Control 48 hpf	0	0	0
0.07 mg/L 96 hpf DMSO 48 hpf	0	0	0
0.07 mg/L 96 hpf 0.07 mg/L 48 hpf	0	0	0
0.07 mg/L 96 hpf 0.4 mg/L 48 hpf	0	0	0
0.07 mg/L 96 hpf 0.75 mg/L 48 hpf	0	0	0
0.07 mg/L 96 hpf 1.5 mg/L 48 hpf	0	0	0
0.07 mg/L 96 hpf 3 mg/L 48 hpf	0	0	0
0.07 mg/L 96 hpf Control 72 hpf	0	0	0
0.07 mg/L 96 hpf DMSO 72 hpf	0	0	0
0.07 mg/L 96 hpf 0.07 mg/L 72 hpf	0	0	0
0.07 mg/L 96 hpf 0.4 mg/L 72 hpf	0	0	0
0.07 mg/L 96 hpf 0.75 mg/L 72 hpf	0	0	0
0.07 mg/L 96 hpf 1.5 mg/L 72 hpf	0	0	0
0.07 mg/L 96 hpf 3 mg/L 72 hpf	0	0	0
0.07 mg/L 96 hpf Control 96 hpf	0	0	0
0.07 mg/L 96 hpf DMSO 96 hpf	0	0	0
0.4 mg/L 96 hpf Control 48 hpf	0	0	0
0.4 mg/L 96 hpf DMSO 48 hpf	0	0	0
0.4 mg/L 96 hpf 0.07 mg/L 48 hpf	0	0	0
0.4 mg/L 96 hpf 0.4 mg/L 48 hpf	0	0	0
0,4 mg/L 96 hpf 0.75 mg/L 48 hpf	0	0	0
0.4 mg/L 96 hpf 1.5 mg/L 48 hpf	0	0	0
0.4 mg/L 96 hpf 3 mg/L 48 hpf	0	0	0
0.4 mg/L 96 hpf Control 72 hpf	0	0	0
0.4 mg/L 96 hpf DMSO 72 hpf	0	0	0
0.4 mg/L 96 hpf 0.07 mg/L 72 hpf	0	0	0
0.4 mg/L 96 hpf 0.4 mg/L 72 hpf	0	0	0
0.4 mg/L 96 hpf 0.75 mg/L 72 hpf	0	0	0
0.4 mg/L 96 hpf 1.5 mg/L 72 hpf	0	0	0
0.4 mg/L 96 hpf 3 mg/L 72 hpf	0	0	0
0.4 mg/L 96 hpf Control 96 hpf	0	0	0
0.4 mg/L 96 hpf DMSO 96 hpf	0	0	0
0.4 mg/L 96 hpf 0.07 mg/L 96 hpf	0	0	0
0.75 mg/L 96 hpf Control 48 hpf	0	0	0
0.75 mg/L 96 hpf DMSO 48 hpf	0	0	0
0.75 mg/L 96 hpf 0.07 mg/L 48 hpf	0	0	0
0.75 mg/L 96 hpf 0.4 mg/L 48 hpf	0	0	0
0.75 mg/L 96 hpf 0.75 mg/L 48 hpf	0	0	0
0.75 mg/L 96 hpf 1.5 mg/L 48 hpf	0	0	0
0.75 mg/L 96 hpf 3 mg/L 48 hpf	0	0	0
0.75 mg/L 96 hpf Control 72 hpf	0	0	0
0.75 mg/L 96 hpf DMSO 72 hpf	0	0	0
0.75 mg/L 96 hpf 0.07 mg/L 72 hpf	0	0	0
0.75 mg/L 96 hpf 0.4 mg/L 72 hpf	0	0	0
0.75 mg/L 96 hpf 0.75 mg/L 72 hpf	0	0	0
0.75 mg/L 96 hpf 1.5 mg/L 72 hpf	0	0	0
0.75 mg/L 96 hpf 3 mg/L 72 hpf	0	0	0
0.75 mg/L 96 hpf Control 96 hpf	0	0	0
0.75 mg/L 96 hpf DMSO 96 hpf	0	0	0
0.75 mg/L 96 hpf 0.07 mg/L 96 hpf	0	0	0
0.75 mg/L 96 hpf 0.4 mg/L 96 hpf	0	0	0
1.5 mg/L 96 hpf Control 48 hpf	0	0	0
1.5 mg/L 96 hpf DMSO 48 hpf	0	0	0
1.5 mg/L 96 hpf 0.07 mg/L 48 hpf	0	0	0
1.5 mg/L 96 hpf 0.4 mg/L 48 hpf	0	0	0
1.5 mg/L 96 hpf 0.75 mg/L 48 hpf	0	0	0
1.5 mg/L 96 hpf 1.5 mg/L 48 hpf	0	0	0
1.5 mg/L 96 hpf 3 mg/L 48 hpf	0	0	0
1.5 mg/L 96 hpf Control 72 hpf	0	0	0
1.5 mg/L 96 hpf DMSO 72 hpf	0	0	0
1.5 mg/L 96 hpf 0.07 mg/L 72 hpf	0	0	0
1.5 mg/L 96 hpf 0.4 mg/L 72 hpf	0	0	0
1.5 mg/L 96 hpf 0.75 mg/L 72 hpf	0	0	0
1.5 mg/L 96 hpf 1.5 mg/L 72 hpf	0	0	0
1.5 mg/L 96 hpf 3 mg/L 72 hpf	0	0	0
1.5 mg/L 96 hpf Control 96 hpf	0	0	0
1.5 mg/L 96 hpf DMSO 96 hpf	0	0	0
1.5 mg/L 96 hpf 0.07 mg/L 96 hpf	0	0	0
1.5 mg/L 96 hpf 0.4 mg/L 96 hpf	0	0	0
1.5 mg/L 96 hpf 0.75 mg/L 96 hpf	0	0	0
3 mg/L 96 hpf Control 48 hpf	0	0	0
3 mg/L 96 hpf DMSO 48 hpf	0	0	0
3 mg/L 96 hpf 0.07 mg/L 48 hpf	0	0	0
3 mg/L 96 hpf 0.4 mg/L 48 hpf	0	0	0
3 mg/L 96 hpf 0.75 mg/L 48 hpf	0	0	0
3 mg/L 96 hpf 1.5 mg/L 48 hpf	0	0	0
3 mg/L 96 hpf 3 mg/L 48 hpf	0	0	0
3 mg/L 96 hpf Control 72 hpf	0	0	0
3 mg/L 96 hpf DMSO 72 hpf	0	0	0
3 mg/L 96 hpf 0.07 mg/L 72 hpf	0	0	0
3 mg/L 96 hpf 0.4 mg/L 72 hpf	0	0	0
3 mg/L 96 hpf 0.75 mg/L 72 hpf	0	0	0
3 mg/L 96 hpf 1.5 mg/L 72 hpf	0	0	0
3 mg/L 96 hpf 3 mg/L 72 hpf	0	0	0
3 mg/L 96 hpf Control 96 hpf	0	0	0
3 mg/L 96 hpf DMSO 96 hpf	0	0	0
3 mg/L 96 hpf 0.07 mg/L 96 hpf	0	0	0
3 mg/L 96 hpf 0.4 mg/L 96 hpf	0	0	0
3 mg/L 96 hpf 0.75 mg/L 96 hpf	0	0	0
3 mg/L 96 hpf 1.5 mg/L 96 hpf	0	0	0
